# Supplementary material for: Prevalent Accumulation of Non-Optimal Codons through Somatic Mutations in Human Cancers
Source: PLOS journal article supplement (doi:10.1371/journal.pone.0160463), 2016-08-11
Supplement: S8 (10.1371/journal.pone.0160463.s008) [file journal.pone.0160463.s008]

|                    | Datasets                          | O->N  | N->O  | Fold  | p-values <sup>#1</sup> | p-values <sup>#2</sup> |
|--------------------|-----------------------------------|-------|-------|-------|------------------------|------------------------|
| <b>Back-ground</b> | Ortholog-Poly                     | 1,856 | 1,754 | 1.06  |                        |                        |
|                    | SNP-Poly                          | 426   | 341   | 1.25  |                        |                        |
| <b>CSM</b>         | Colon_Adenocarcinoma              | 1,819 | 617   | 2.95  | 9.16E-74               | 6.031E-24              |
|                    | Ovarian_Serous_Cystadenocarcinoma | 973   | 247   | 3.94  | 1.31E-67               | 1.156E-30              |
|                    | Liver_Cancer                      | 859   | 336   | 2.56  | 3.69E-35               | 1.087E-13              |
|                    | Rectum_Adenocarcinoma             | 398   | 148   | 2.69  | 6.00E-21               | 1.453E-10              |
|                    | Breast_Carcinoma                  | 216   | 39    | 5.54  | 6.82E-25               | 6.931E-17              |
|                    | Breast_Invasive_Carcinoma         | 203   | 31    | 6.55  | 8.25E-26               | 5.224E-18              |
|                    | Pancreatic_Cancer                 | 112   | 33    | 3.39  | 1.02E-09               | 1.104E-06              |
|                    | Acute_Myeloid_Leukemia            | 90    | 15    | 6.00  | 3.99E-12               | 3.644E-09              |
|                    | Lung_Adenocarcinoma               | 66    | 3     | 22.00 | 3.15E-13               | 8.857E-11              |
|                    | Gastric_Cancer                    | 57    | 35    | 1.63  | 0.045                  | 0.241                  |
|                    | Glioblastoma_Multiforme           | 42    | 8     | 5.25  | 4.64E-06               | 8.093E-05              |
|                    | Chronic_Lymphocytic_Leukemia      | 40    | 15    | 2.67  | 0.0016922              | 0.0129654              |
|                    | Pediatric_Brain_Tumors            | 37    | 8     | 4.63  | 3.94E-05               | 0.0004417              |
|                    | Breast_Cancer                     | 26    | 5     | 5.20  | 0.000317               | 0.0018057              |
|                    | Malignant_Lymphoma                | 22    | 10    | 2.20  | 0.050                  | 0.140                  |
|                    | Colorectal_Cancer                 | 16    | 9     | -     | -                      | -                      |
|                    | Prostate_Cancer                   | 16    | 8     | -     | -                      | -                      |
|                    | Small_Cell_Lung_Carcinoma         | 11    | 1     | -     | -                      | -                      |
|                    | Malignant_Melanoma                | 7     | 2     | -     | -                      | -                      |
|                    | Lung_Squamous_Cell_Carcinoma      | 5     | 3     | -     | -                      | -                      |
|                    | Myeloproliferative_Disorders      | 2     | 0     | -     | -                      | -                      |

The p-values<sup>#1</sup> were obtained from the comparison in folds of O->N/N->O between the CSM and Ortholog-Poly, the p-values<sup>#2</sup> were obtained from the comparison in folds of O->N/N->O between the CSM and SNP-Poly. The datasets with a total number of O->N and N->O larger than 30 were analyzed, the p-values  $\leq 0.05$  were represented by red color and indicate significant higher number of O->N than N->O in CSM considering the distribution from the control datasets.
